# Supplementary material for: Hydrothermal synthesis of carbon quantum dots as fluorescent probes for the sensitive and rapid detection of picric acid
Source: Royal Society of Chemistry journal article supplement (doi:10.1039/c8ay00441b), 2018-01-01
Supplement: c8ay00441b1.pdf [file c8ay00441b1.pdf]

## Supplementary Material

### Hydrothermal synthesis of carbon quantum dots as fluorescent probe for sensitive and rapid detection of picric acid

Yingte Wang\*, Xiaoyue Chang, Na Jing and Yong Zhang\*

School of Chemistry and Chemical Engineering, Shanxi University, Taiyuan, Shanxi  
Province, 030006, P.R.China

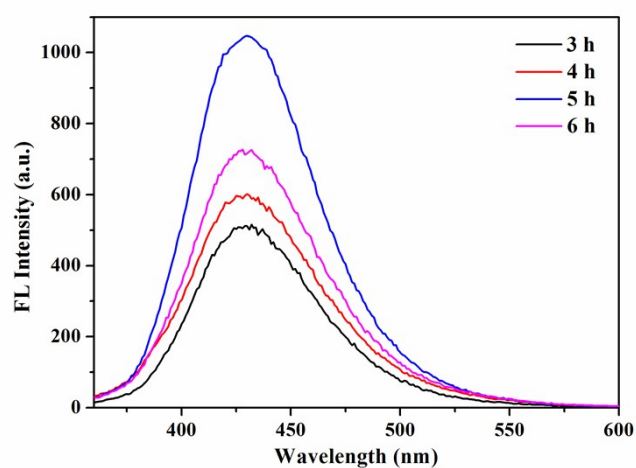

**Fig S1.** Fluorescence emission spectra of N-CDs with different reaction time.

---

\* Corresponding author,

Email address: [yingtew@sxu.edu.cn](mailto:yingtew@sxu.edu.cn) (Yingte Wang); [zhangyong@sxu.edu.cn](mailto:zhangyong@sxu.edu.cn) (Yong Zhang)

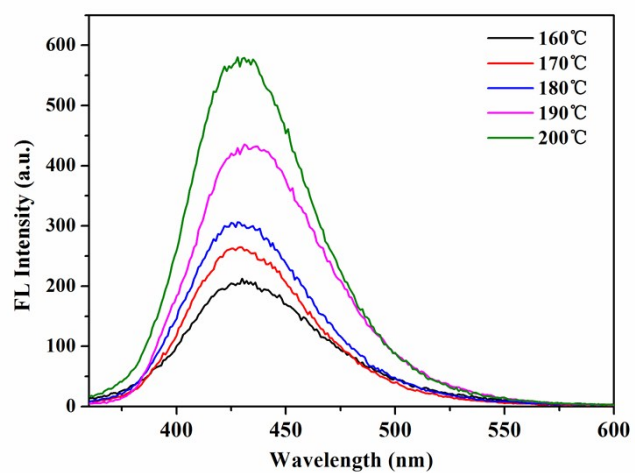

**Fig S2.** Fluorescence emission spectra of N-CDs with different temperature.

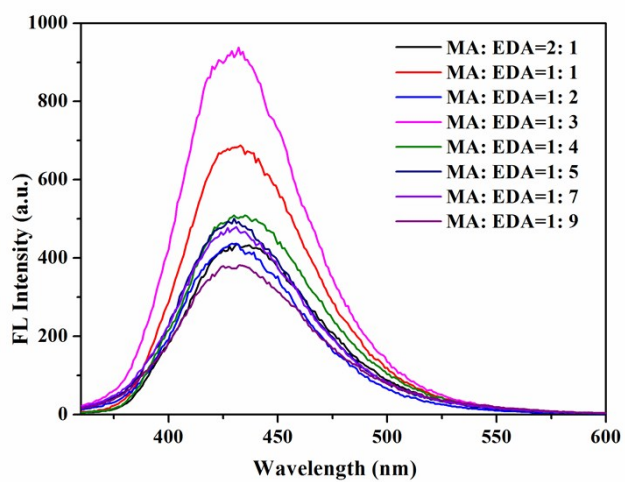

**Fig S3.** Fluorescence emission spectra of N-CDs with different ratio of mandelic acid with ethylenediamine.

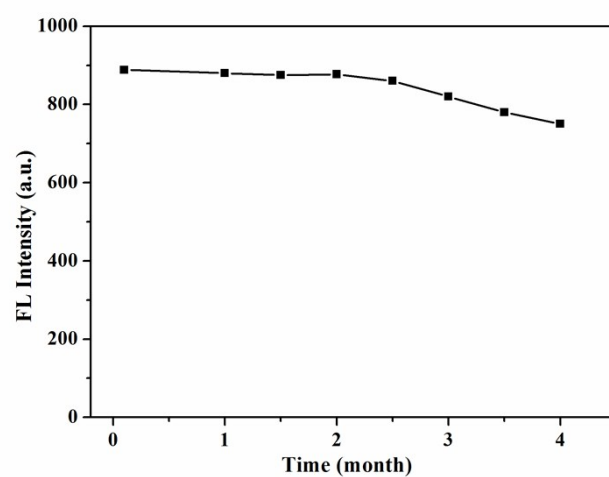

**Fig S4.** Effects of the storage time on the fluorescence intensity of the N-CDs at 429 nm.

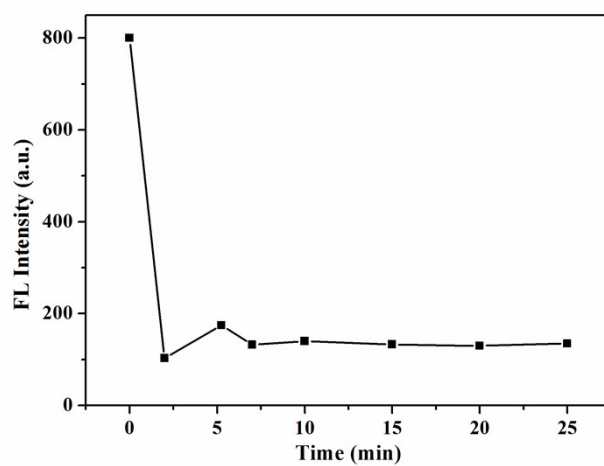

**Fig S5.** The effect of reaction time.

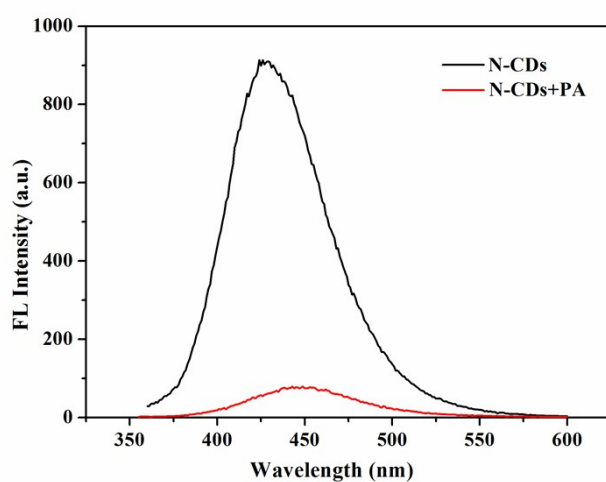

**Fig S6.** Fluorescence emission spectra of N-CDs in the absence and present of PA, respectively.

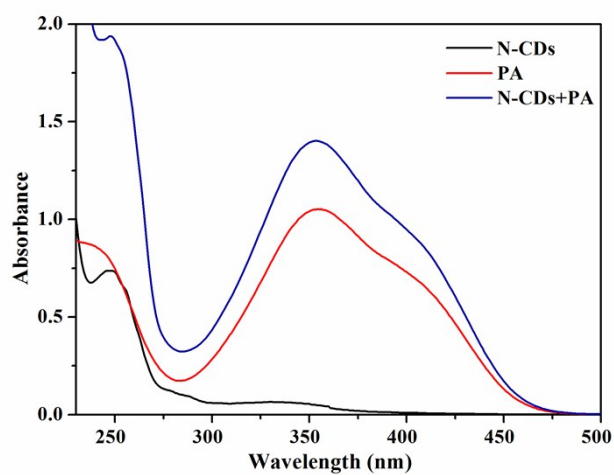

**Fig S7.** UV-vis absorption spectra of N-CDs (black), PA (red), and N-CDs in the presence of PA (blue).

| System   | $\tau_1$ (ns) | Percentage (%) | $\tau_2$ (ns) | Percentage (%) | $\tau_3$ (ns) | Percentage (%) | $\tau_{avg}$ (ns) |
|----------|---------------|----------------|---------------|----------------|---------------|----------------|-------------------|
| N-CDs    | 10.62         | 19.06          | 0.09261       | 38.92          | 1.729         | 42.01          | 2.787             |
| N-CDs+PA | 2.554         | 61.76          | 0.082         | 12.4           | 1.0349        | 25.84          | 1.855             |

**Table S1.** The fluorescence lifetimes of N-CDs in the absence and presence of PA.
